# Supplementary material for: Pre-existing Interstitial Lung Abnormalities and Immune Checkpoint Inhibitor-Related Pneumonitis in Solid Tumors: A Retrospective Analysis
Source: PubMed Central journal article supplement (PMC10769794; doi:10.1093/oncolo/oyad187), 2023-08-17

Supplemental Figure 1. Sequential reading method

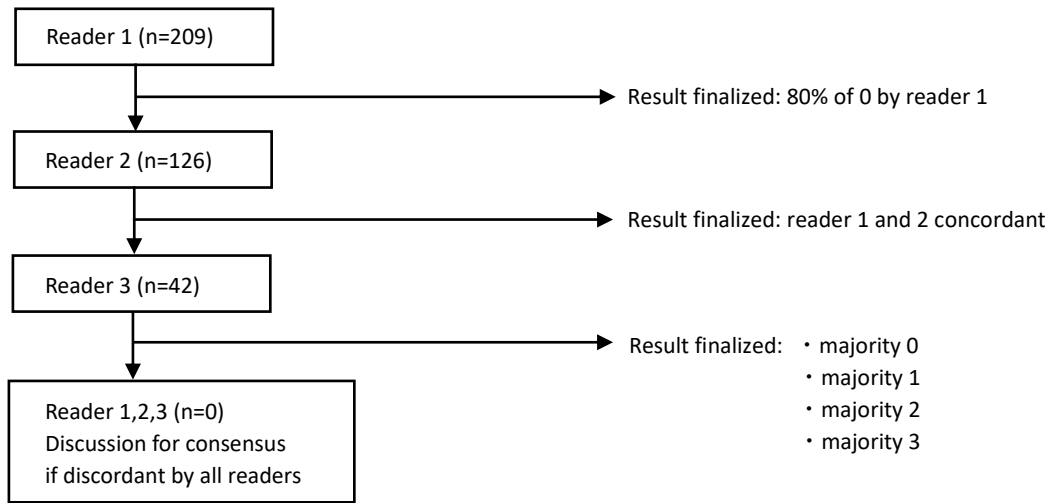

Supplement: oyad187_suppl_supplementary_figure_s1.pdf [file oyad187_suppl_supplementary_figure_s1.pdf]
